# Supplementary material for: Impact of concurrency on the performance of a whole exome sequencing pipeline
Source: PubMed Central journal article supplement (PMC7874478; doi:10.1186/s12859-020-03780-3), 2021-02-09

SRR1299135\_SRR1299134 - SRR1299131\_SRR1299130 with 4 processors

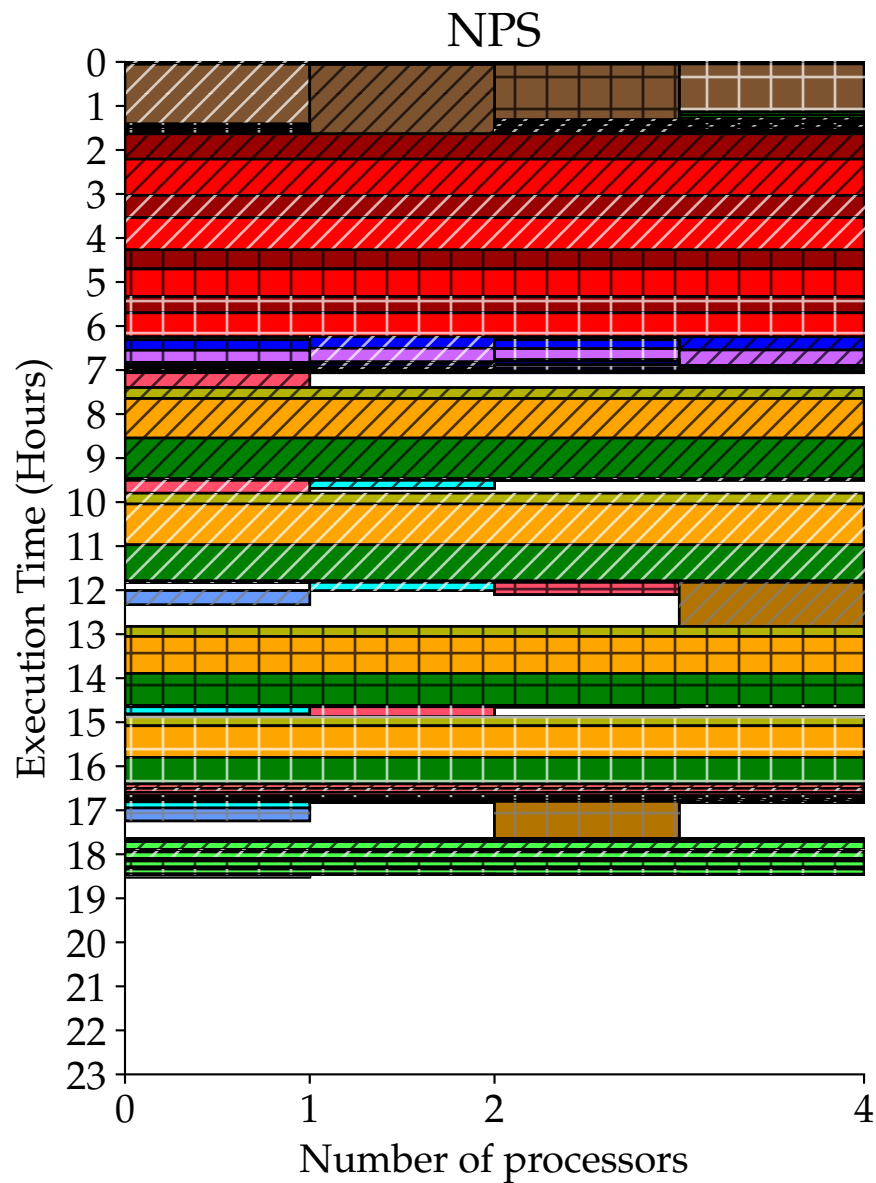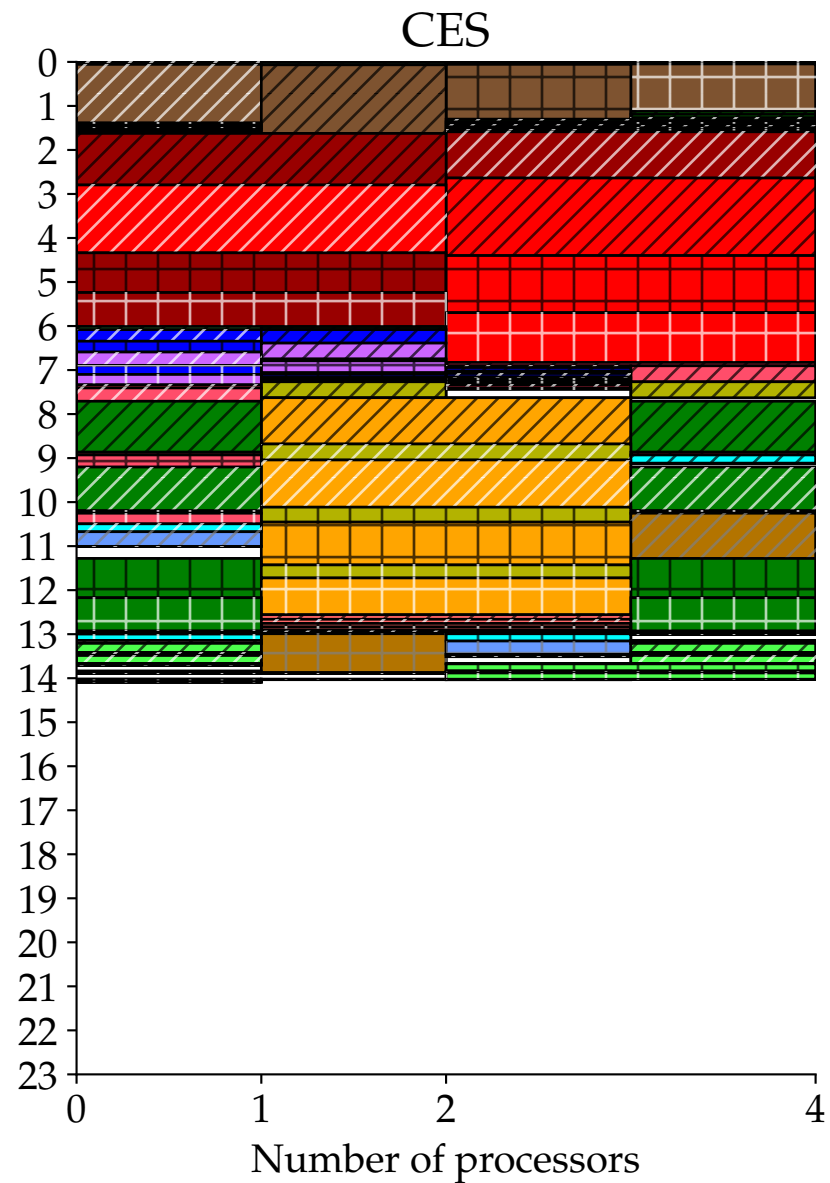

SRR1299141\_SRR1299140 - SRR1299131\_SRR1299130 with 4 processors

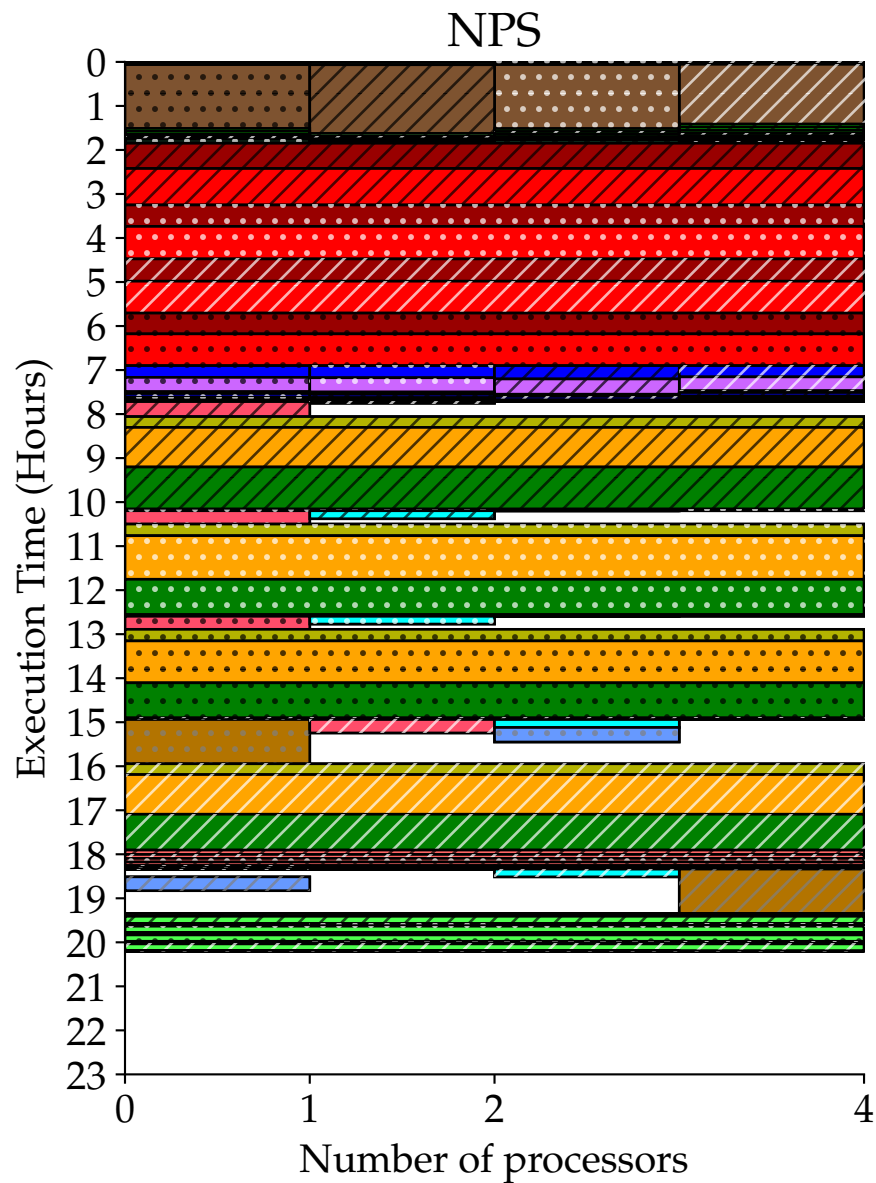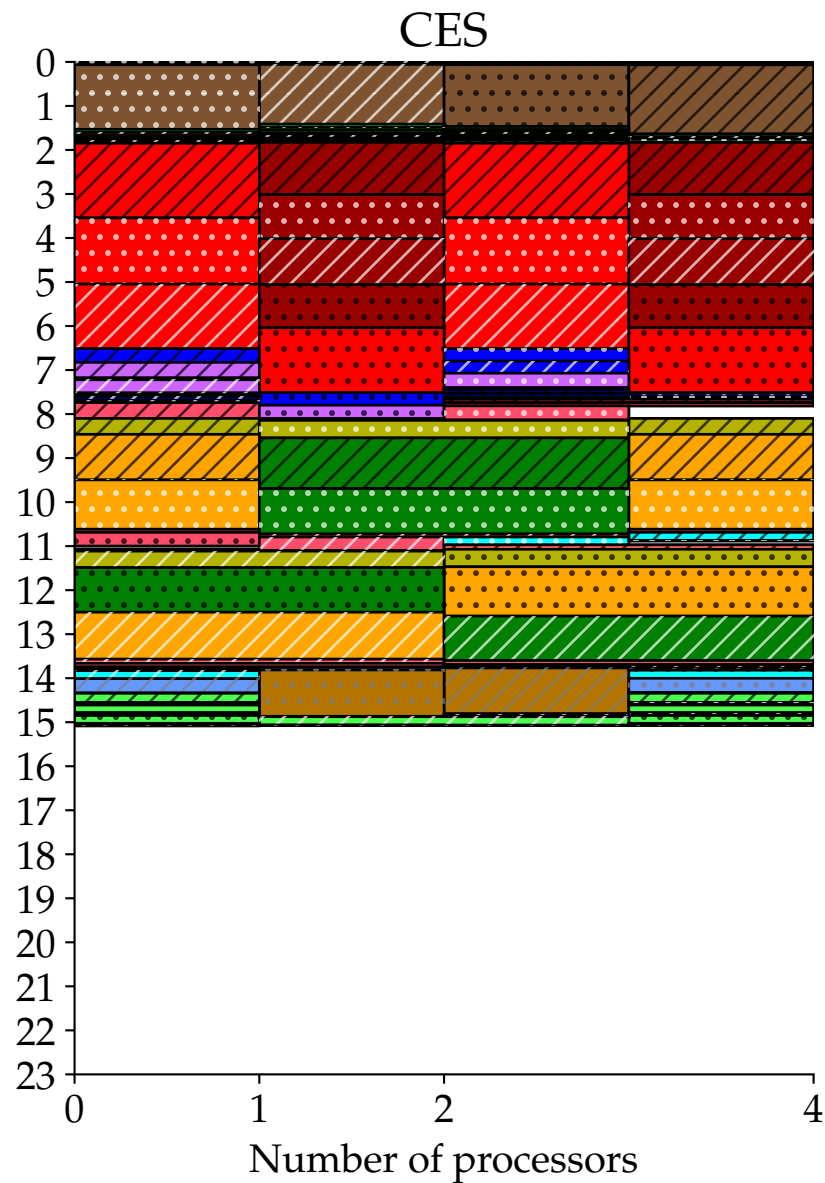

SRR1299141\_SRR1299140 - SRR1299135\_SRR1299134 with 4 processors

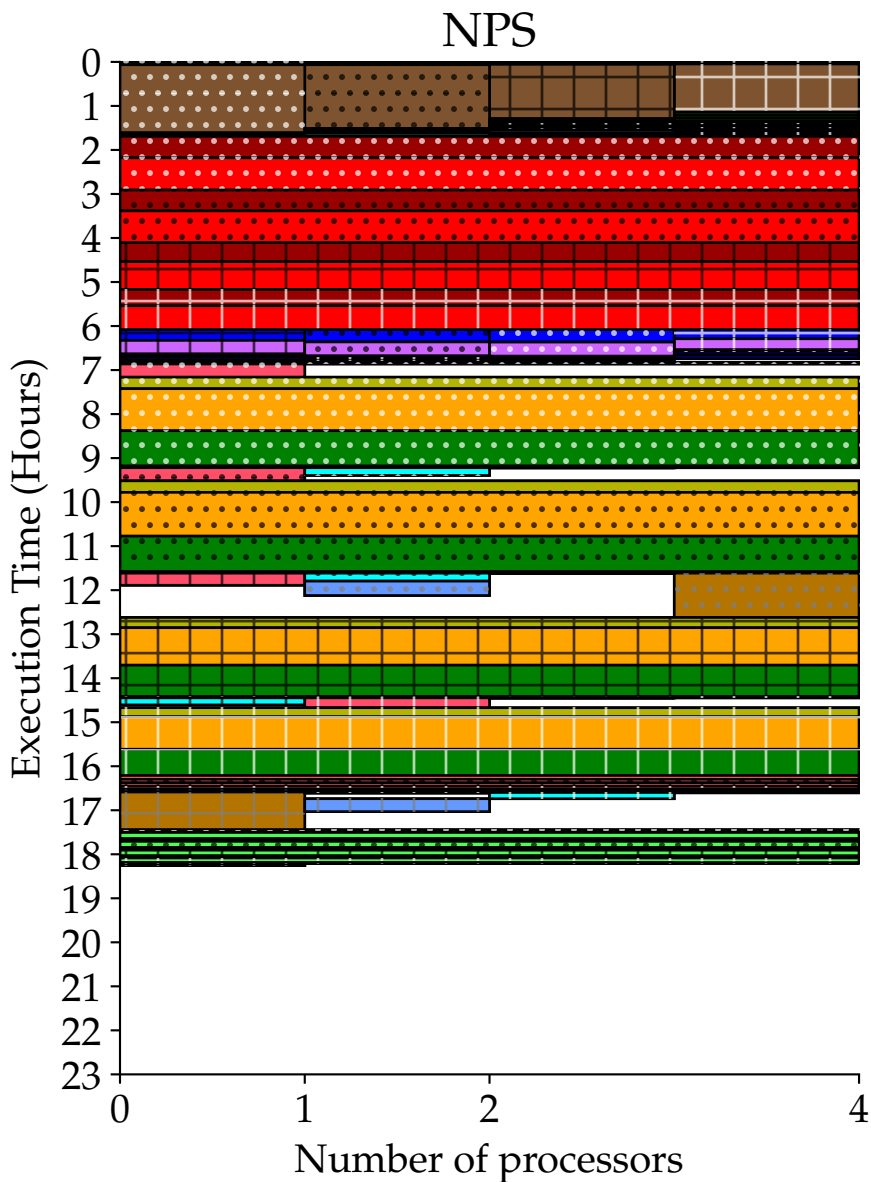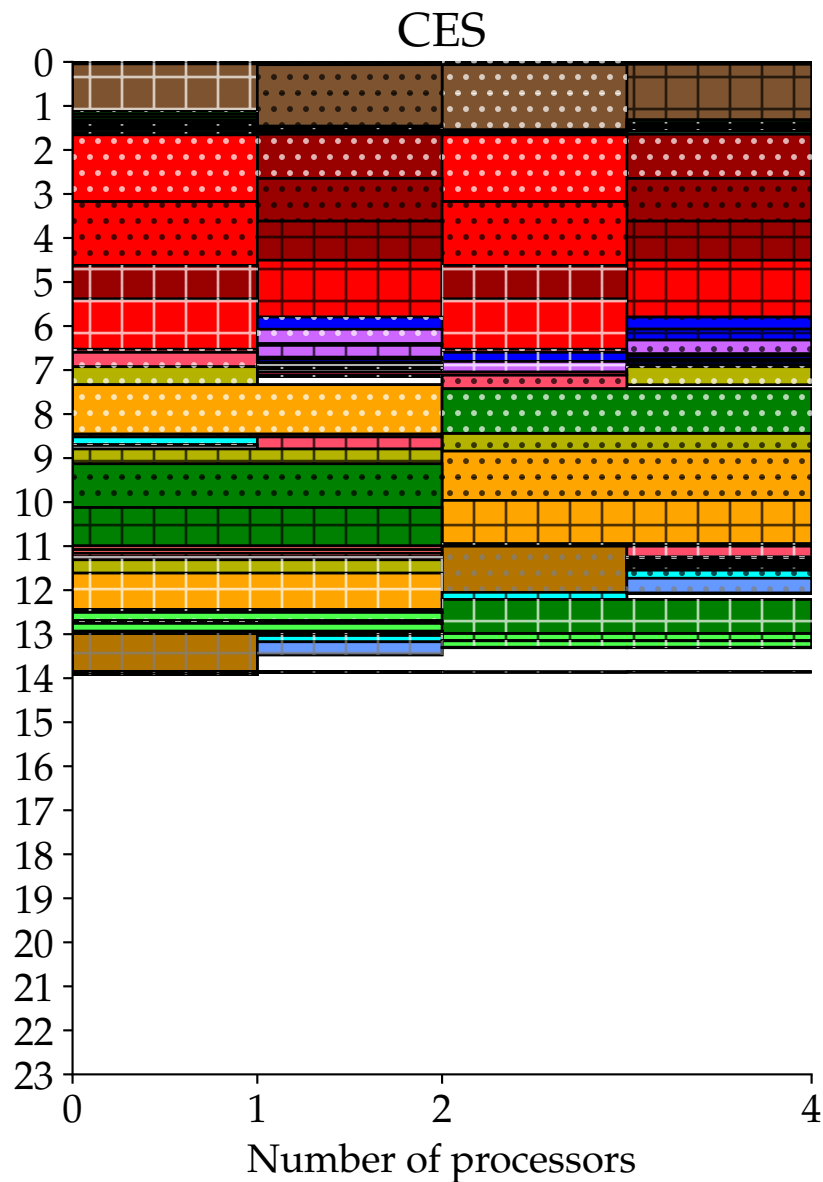

SRR1299135\_SRR1299134 - SRR1299131\_SRR1299130 with 8 processors

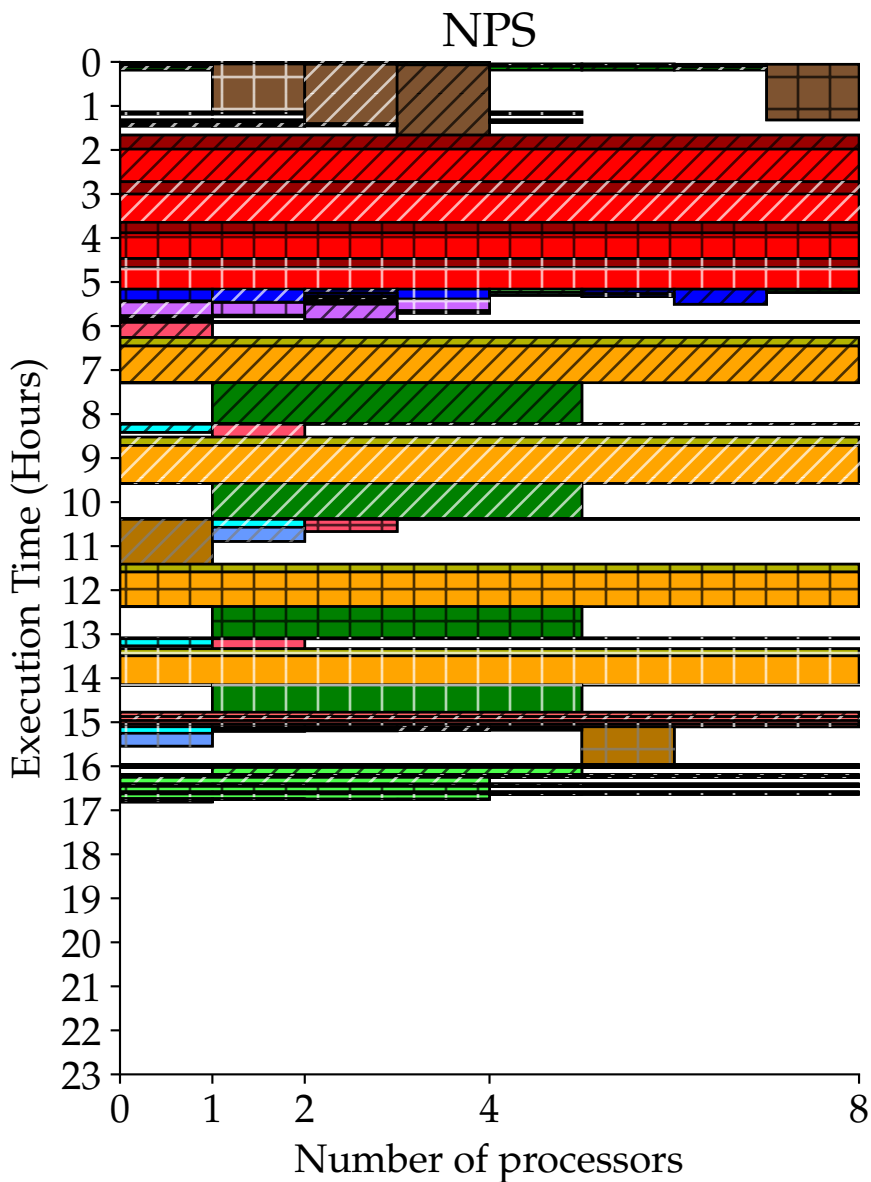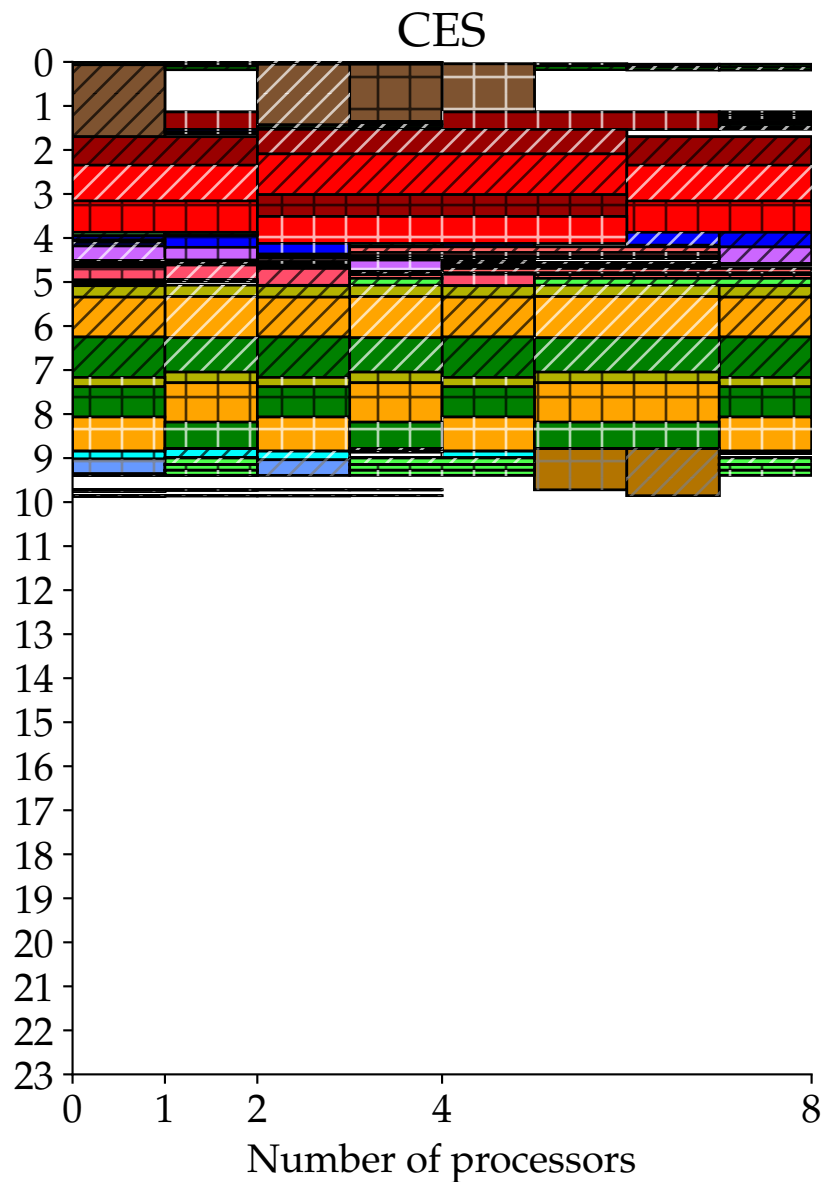

SRR1299141\_SRR1299140 - SRR1299131\_SRR1299130 with 8 processors

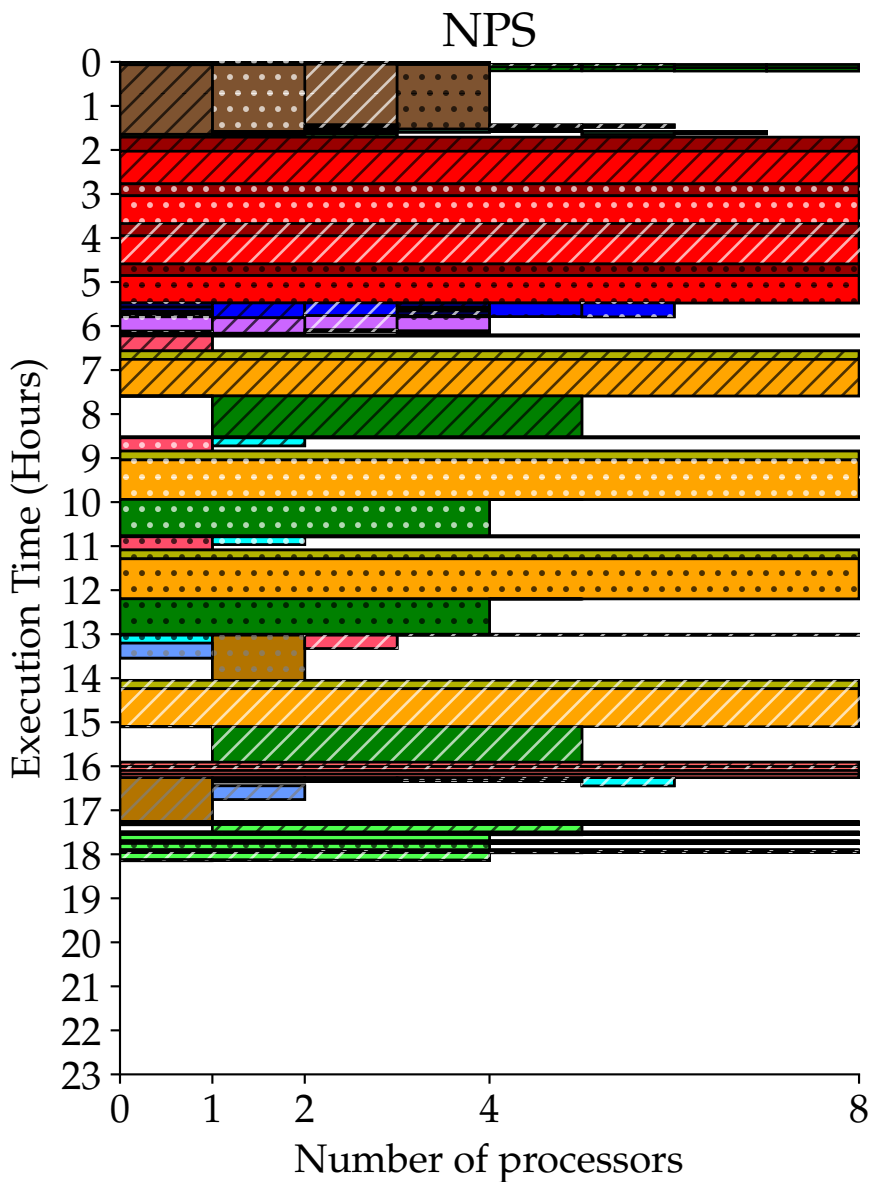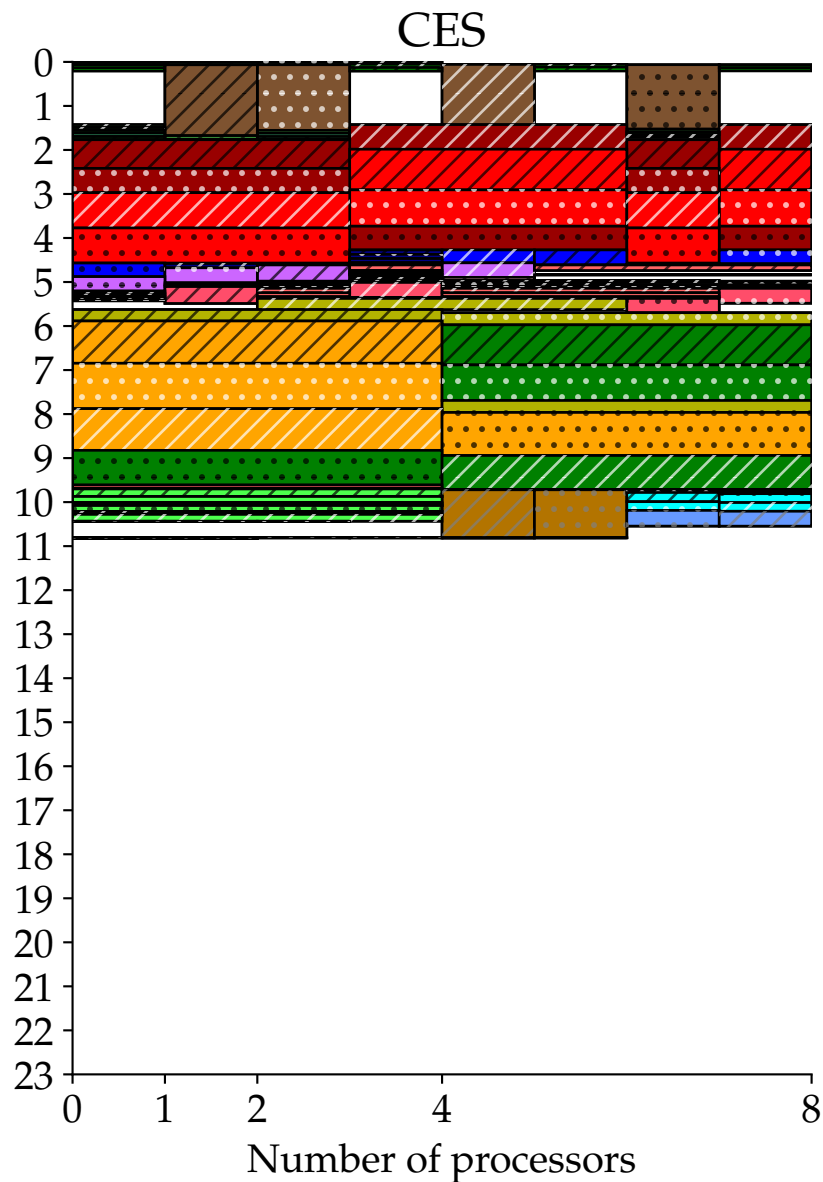

SRR1299141\_SRR1299140 - SRR1299135\_SRR1299134 with 8 processors

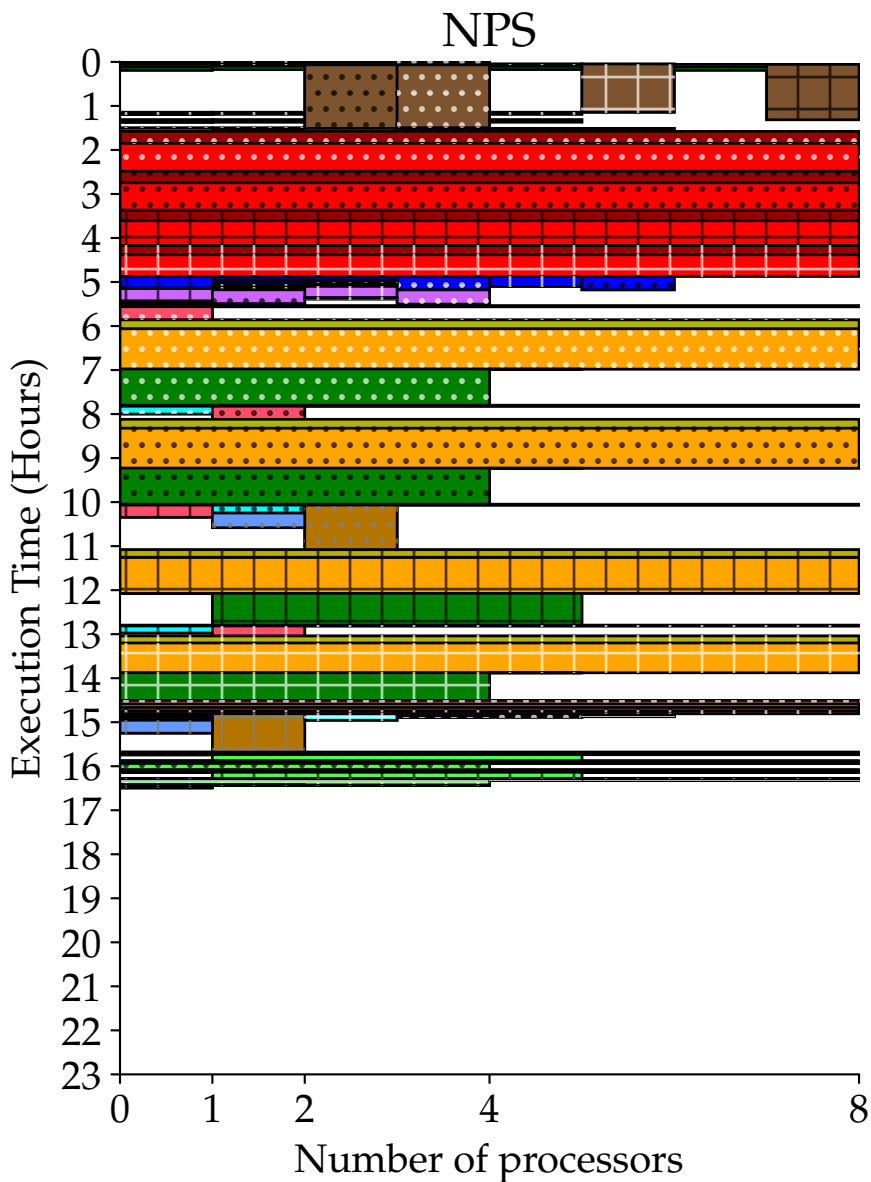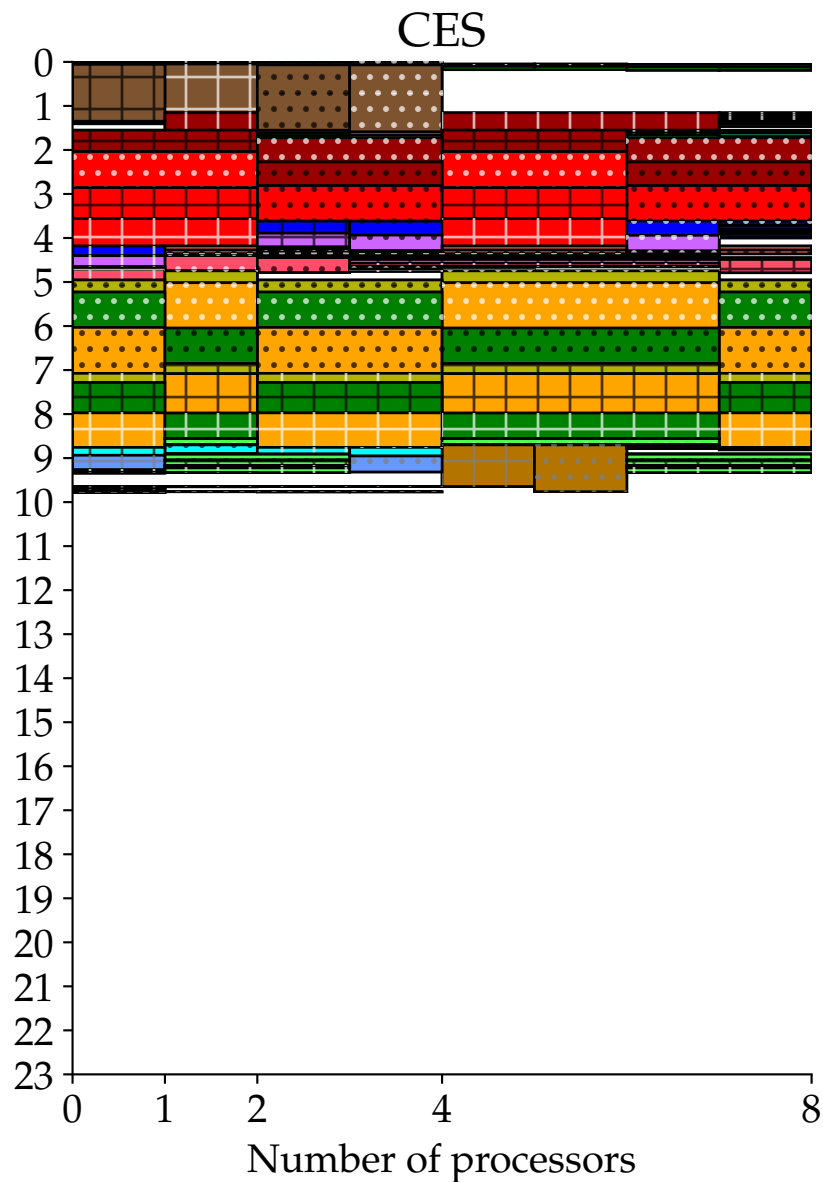

SRR1299135\_SRR1299134 - SRR1299131\_SRR1299130 with 16 processors

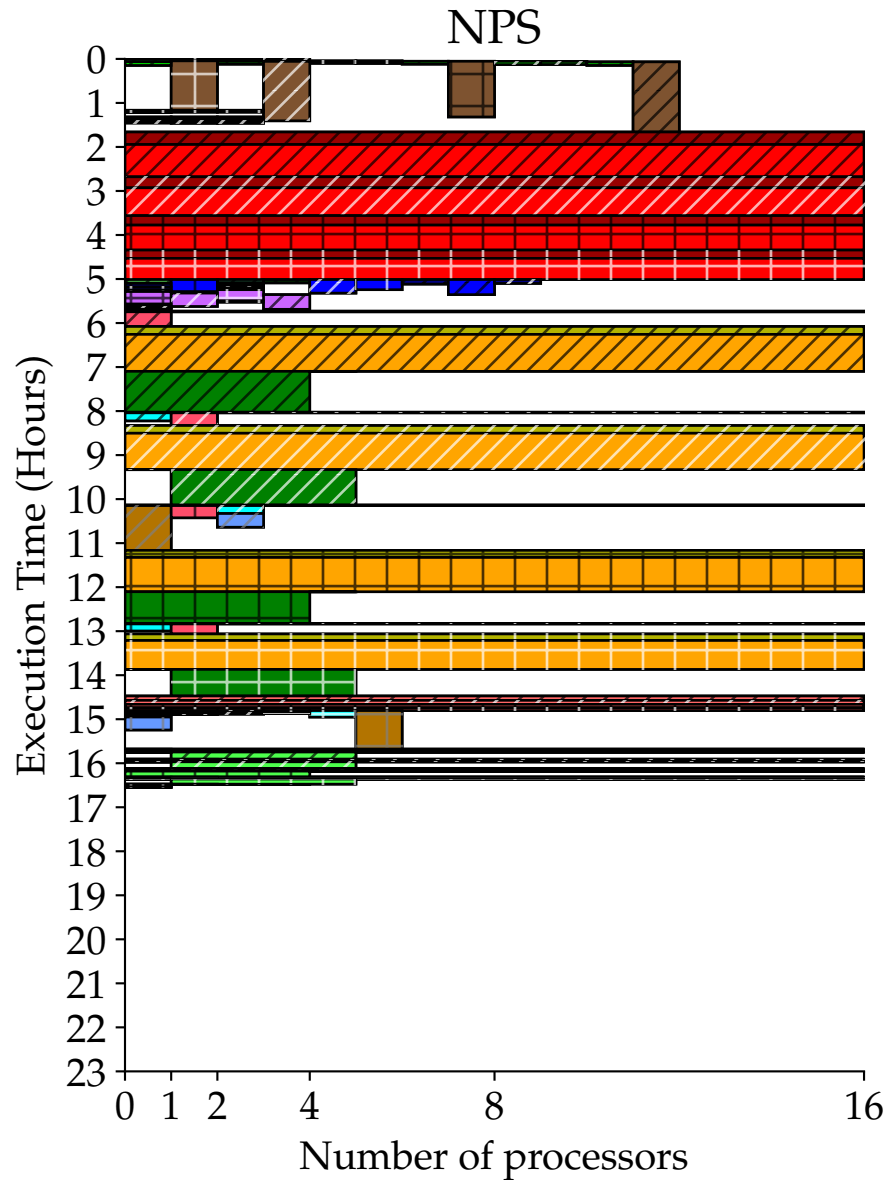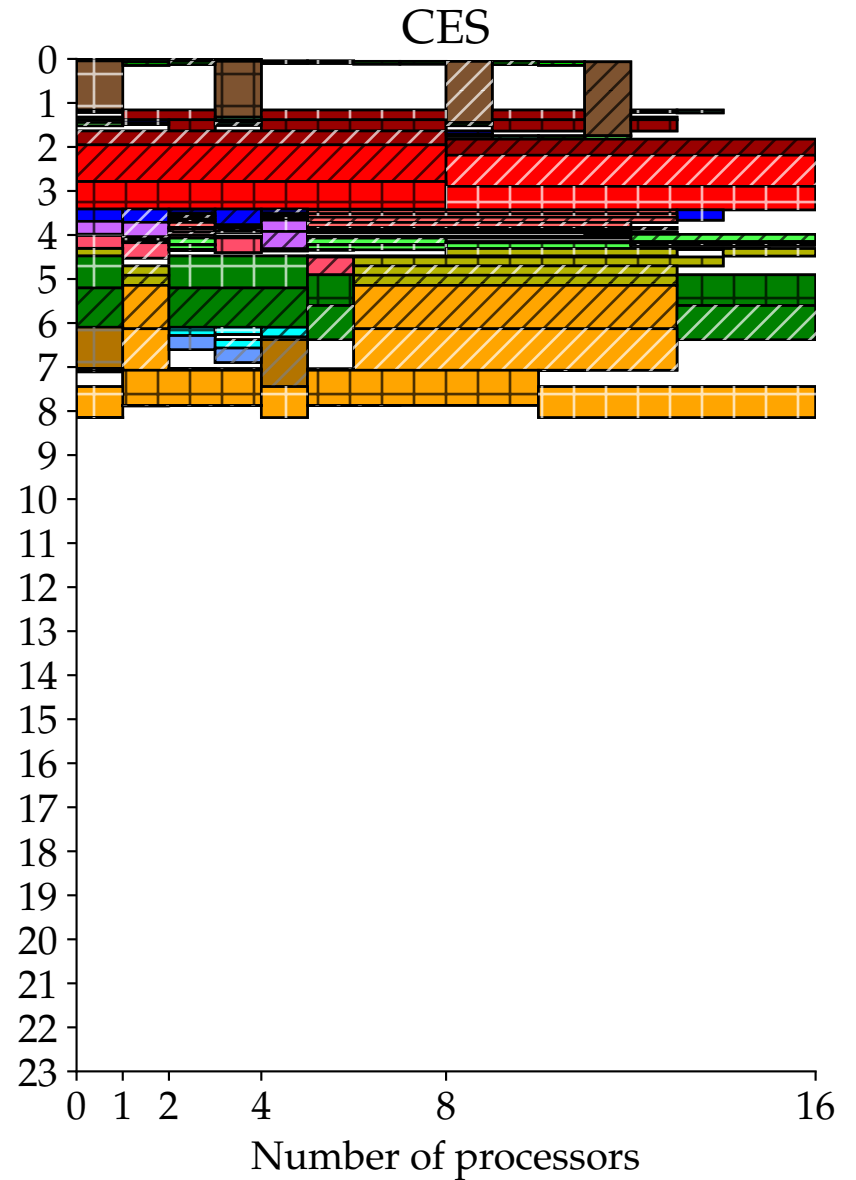

SRR1299141\_SRR1299140 - SRR1299131\_SRR1299130 with 16 processors

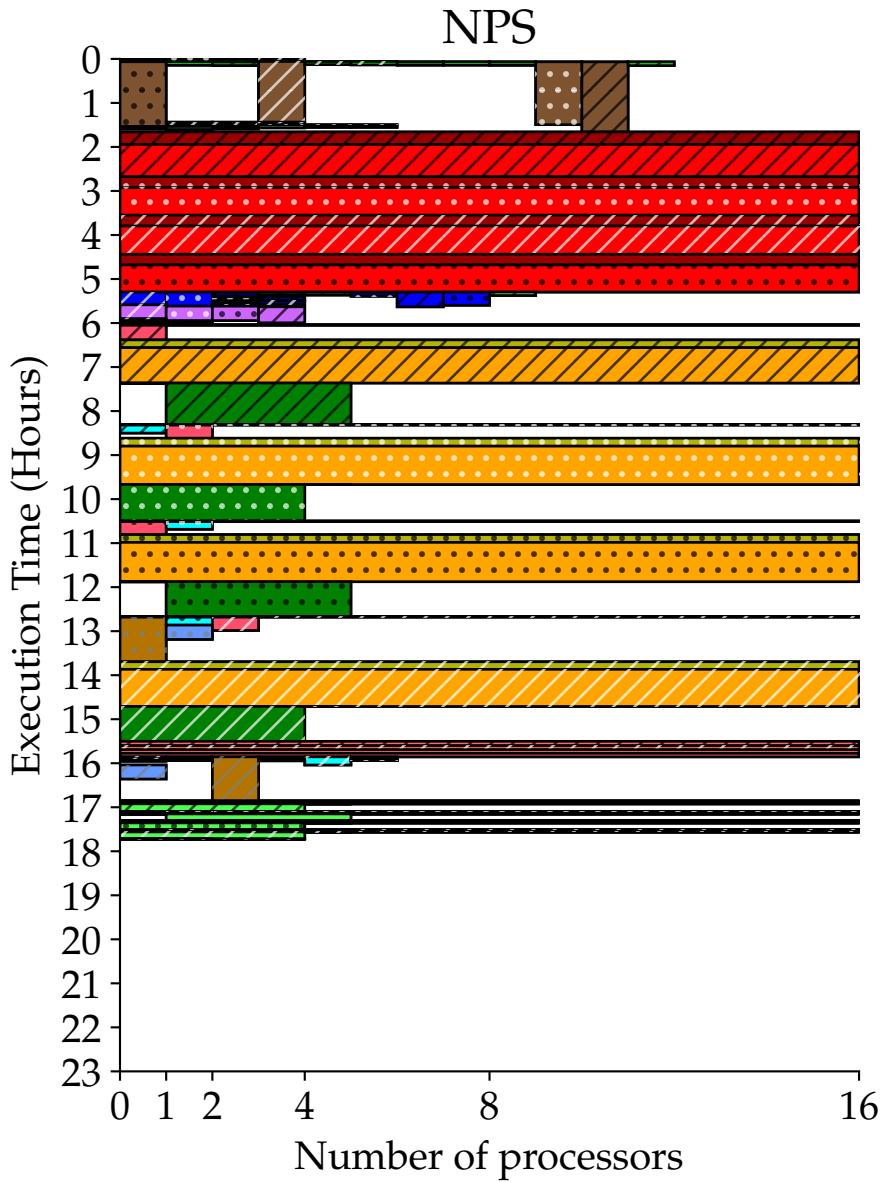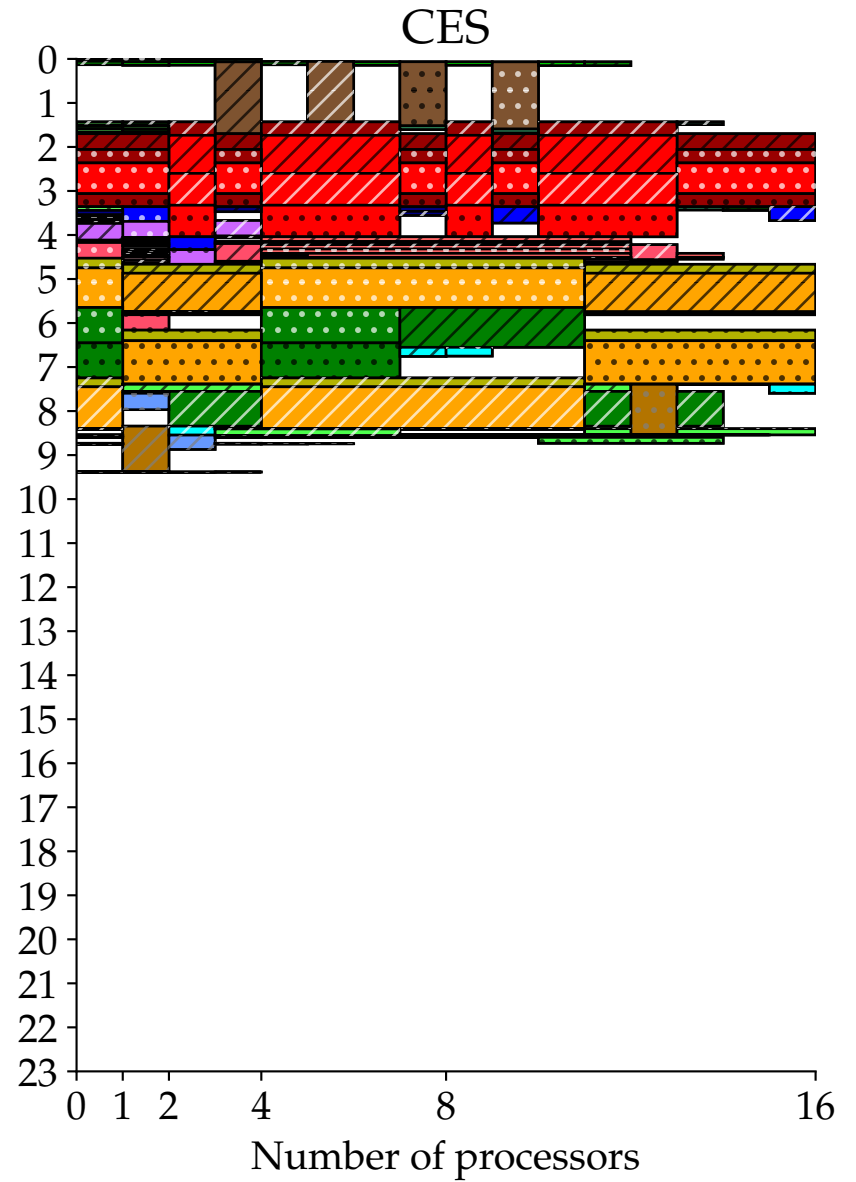



SRR1299141\_SRR1299140 - SRR1299135\_SRR1299134 with 16 processors

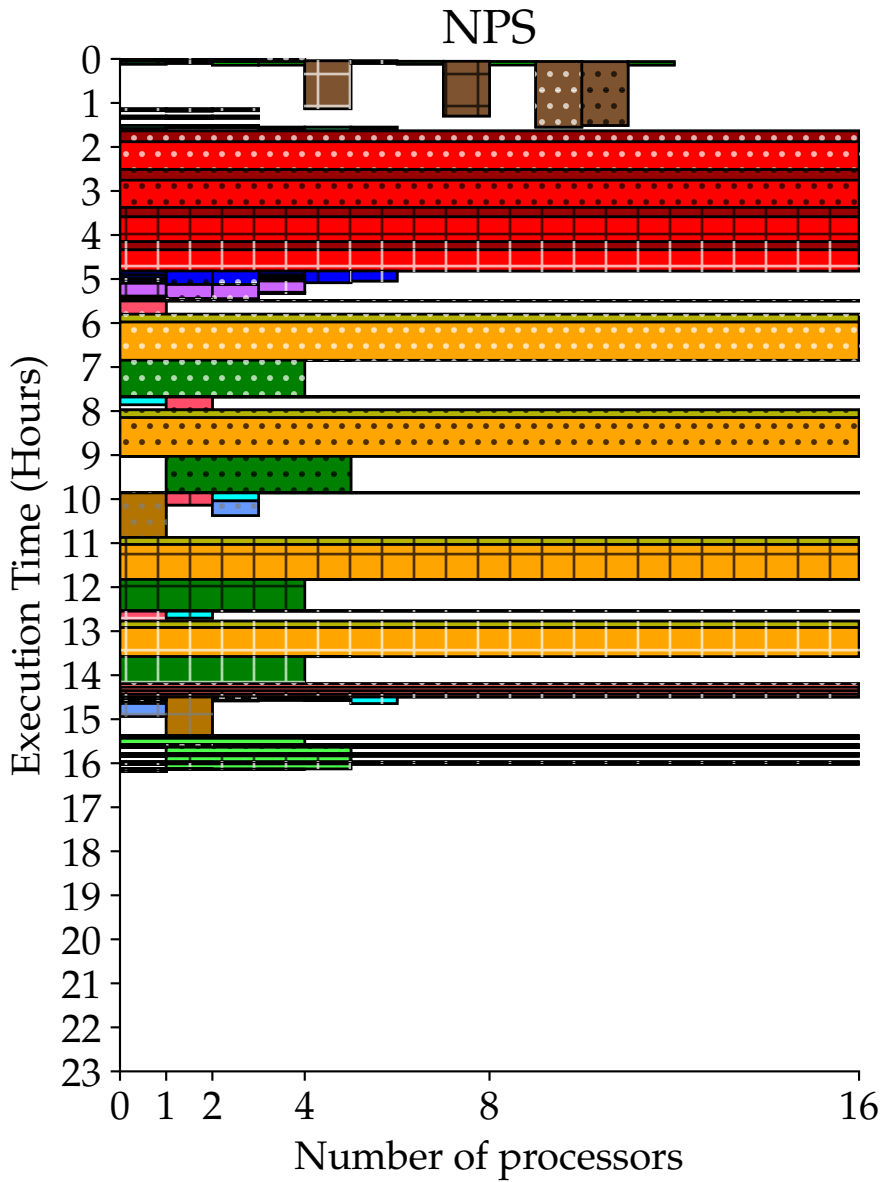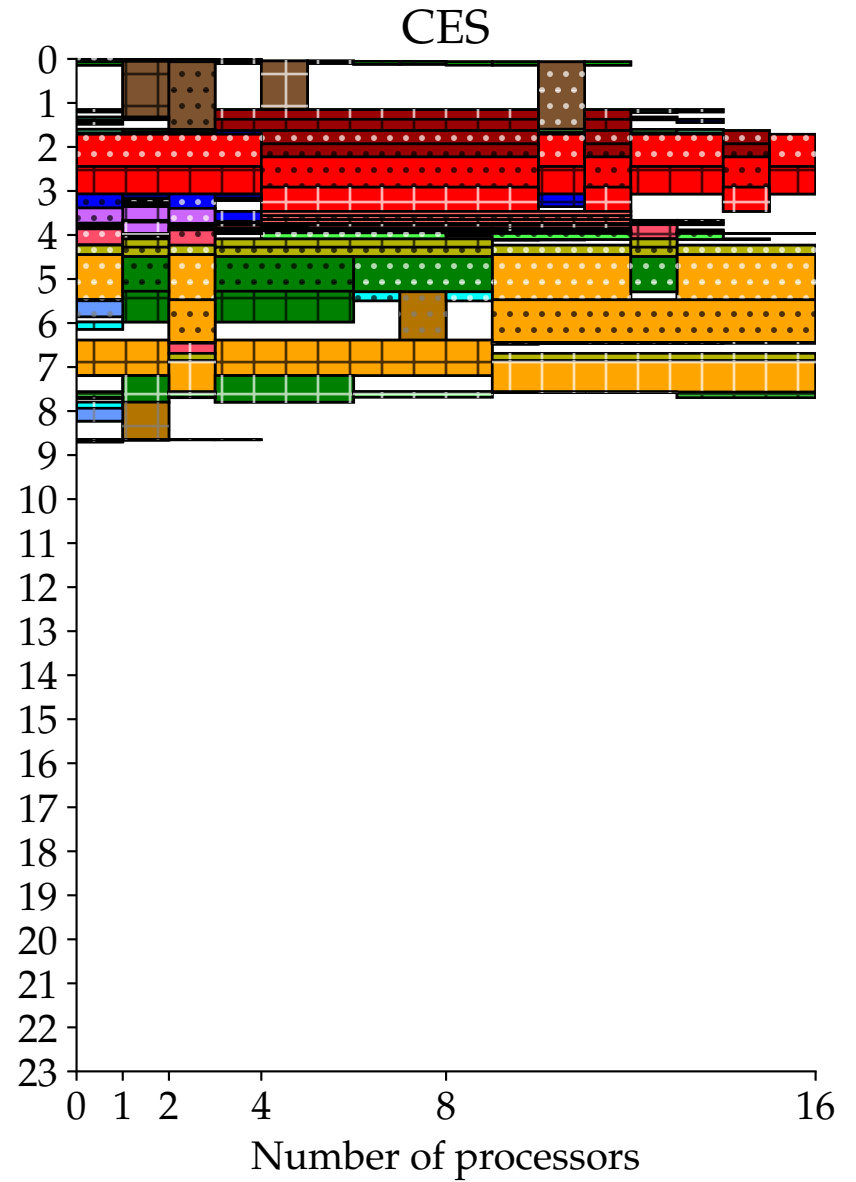

Supplement: 12859_2020_3780_MOESM4_ESM.pdf [file 12859_2020_3780_MOESM4_ESM.pdf]
