# Supplementary material for: Impact of concurrency on the performance of a whole exome sequencing pipeline
Source: PubMed Central journal article supplement (PMC7874478; doi:10.1186/s12859-020-03780-3), 2021-02-09
Supplement: 12859_2020_3780_MOESM1_ESM.pdf [file 12859_2020_3780_MOESM1_ESM.pdf]

## Average execution time for pipeline’s tasks, for all processors configuration and for each strategy

Table 1: Summary of average execution times for each task for a 2-samples run with NPS. The reported amount of processors is the number of them supplied to the whole run and managed by the chosen strategy. Only tasks with at least 60 seconds of execution time have been reported. PaCo tasks are labelled by \*.

| Task                    | 4 processors<br><i>Mean ± Std (s)</i> | 8 processors<br><i>Mean ± Std (s)</i> | 16 processors<br><i>Mean ± Std (s)</i> |
|-------------------------|---------------------------------------|---------------------------------------|----------------------------------------|
| Read trimming           | 4739 ± 574                            | 4740 ± 560                            | 4737 ± 580                             |
| Align to nuclear*       | 2367 ± 270                            | 2077 ± 207                            | 2059 ± 208                             |
| Align to exome*         | 1589 ± 160                            | 885 ± 90                              | 804 ± 88                               |
| Align to MT*            | 275 ± 24                              | 272 ± 23                              | 274 ± 24                               |
| Sort nuclear            | 906 ± 112                             | 1002 ± 122                            | 1005 ± 120                             |
| Sort exome              | 278 ± 32                              | 301 ± 34                              | 301 ± 33                               |
| Sort MT                 | 127 ± 13                              | 135 ± 13                              | 135 ± 13                               |
| Mark nuclear            | 1064 ± 101                            | 1055 ± 94                             | 1050 ± 89                              |
| Mark MT                 | 125 ± 11                              | 131 ± 12                              | 131 ± 11                               |
| Index nuclear           | 134 ± 20                              | 132 ± 15                              | 125 ± 13                               |
| Realign INDELs nuclear* | 989 ± 109                             | 991 ± 104                             | 985 ± 105                              |
| Realign INDELs MT*      | 175 ± 16                              | 174 ± 16                              | 175 ± 17                               |
| Compute BQSR nuclear*   | 861 ± 91                              | 667 ± 62                              | 602 ± 47                               |
| Apply BQSR nuclear      | 2636 ± 303                            | 2676 ± 296                            | 2678 ± 316                             |
| Apply BQSR MT           | 485 ± 56                              | 482 ± 59                              | 476 ± 56                               |
| Post BQSR nuclear*      | 3150 ± 350                            | 2965 ± 345                            | 2892 ± 309                             |
| MuTect nuclear          | 3367 ± 260                            | 3392 ± 250                            | 3384 ± 241                             |
| Mpileup nuclear         | 589 ± 56                              | 595 ± 47                              | 594 ± 48                               |
| VarScan2 nuclear        | 1122 ± 69                             | 1124 ± 71                             | 1119 ± 71                              |

Table 2: Summary of average execution times for each task for a 2-samples run with CES. The reported amount of processors is the number of them supplied to the whole run and managed by the chosen strategy. Only tasks with at least 60 seconds of execution time have been reported. PaCo tasks are labelled by \*.

| Task                    | 4 processors<br><i>Mean ± Std (s)</i> | 8 processors<br><i>Mean ± Std (s)</i> | 16 processors<br><i>Mean ± Std (s)</i> |
|-------------------------|---------------------------------------|---------------------------------------|----------------------------------------|
| Read trimming           | 4712 ± 578                            | 4855 ± 620                            | 4907 ± 679                             |
| Align to nuclear*       | 4846 ± 526                            | 2645 ± 281                            | 2315 ± 245                             |
| Align to exome*         | 3263 ± 329                            | 1770 ± 220                            | 981 ± 134                              |
| Align to MT*            | 285 ± 24                              | 300 ± 30                              | 322 ± 34                               |
| Sort nuclear            | 907 ± 106                             | 1019 ± 145                            | 1041 ± 135                             |
| Sort exome              | 286 ± 34                              | 317 ± 46                              | 318 ± 37                               |
| Sort MT                 | 128 ± 13                              | 135 ± 13                              | 148 ± 20                               |
| Mark nuclear            | 1028 ± 123                            | 1135 ± 151                            | 1122 ± 122                             |
| Mark MT                 | 124 ± 12                              | 136 ± 18                              | 142 ± 19                               |
| Index nuclear           | 130 ± 18                              | 145 ± 20                              | 156 ± 25                               |
| Realign INDELS nuclear* | 1035 ± 118                            | 1102 ± 144                            | 1167 ± 149                             |
| Realign INDELS MT*      | 182 ± 16                              | 196 ± 20                              | 207 ± 15                               |
| Compute BQSR nuclear*   | 1293 ± 153                            | 890 ± 101                             | 739 ± 78                               |
| Apply BQSR nuclear      | 3299 ± 351                            | 2587 ± 310                            | 2604 ± 292                             |
| Apply BQSR MT           | 599 ± 63                              | 456 ± 45                              | 453 ± 45                               |
| Post BQSR nuclear*      | 3664 ± 434                            | 3361 ± 386                            | 3143 ± 474                             |
| MuTect nuclear          | 3451 ± 318                            | 3609 ± 246                            | 3544 ± 273                             |
| Mpileup nuclear         | 597 ± 57                              | 651 ± 63                              | 651 ± 71                               |
| VarScan2 nuclear        | 1145 ± 79                             | 1262 ± 73                             | 1193 ± 75                              |

Table 3: Summary of average execution times for each task for a 3-samples run with NPS. The reported amount of processors is the number of them supplied to the whole run and managed by the chosen strategy. Only tasks with at least 60 seconds of execution time have been reported. PaCo tasks are labelled by \*.

| Task                    | 6 processors<br><i>Mean ± Std (s)</i> | 12 processors<br><i>Mean ± Std (s)</i> | 24 processors<br><i>Mean ± Std (s)</i> |
|-------------------------|---------------------------------------|----------------------------------------|----------------------------------------|
| Read trimming           | 5186 ± 574                            | 5300 ± 596                             | 5367 ± 593                             |
| Align to nuclear*       | 2221 ± 277                            | 2198 ± 279                             | 2244 ± 288                             |
| Align to exome*         | 1216 ± 160                            | 853 ± 109                              | 887 ± 113                              |
| Align to MT*            | 295 ± 38                              | 298 ± 40                               | 303 ± 41                               |
| Sort nuclear            | 1003 ± 121                            | 1040 ± 124                             | 1047 ± 124                             |
| Sort exome              | 299 ± 35                              | 306 ± 35                               | 307 ± 35                               |
| Sort MT                 | 144 ± 17                              | 154 ± 18                               | 153 ± 18                               |
| Mark nuclear            | 1127 ± 124                            | 1162 ± 116                             | 1159 ± 124                             |
| Mark MT                 | 141 ± 14                              | 147 ± 13                               | 148 ± 13                               |
| Index nuclear           | 170 ± 34                              | 173 ± 31                               | 171 ± 32                               |
| Realign INDELS nuclear* | 1041 ± 119                            | 1044 ± 118                             | 1050 ± 120                             |
| Realign INDELS MT*      | 186 ± 22                              | 187 ± 22                               | 187 ± 22                               |
| Compute BQSR nuclear*   | 741 ± 59                              | 640 ± 45                               | 595 ± 34                               |
| Apply BQSR nuclear      | 2807 ± 350                            | 2723 ± 353                             | 2703 ± 335                             |
| Apply BQSR MT           | 524 ± 75                              | 485 ± 62                               | 492 ± 66                               |
| Post BQSR nuclear*      | 3047 ± 283                            | 2933 ± 274                             | 2891 ± 243                             |
| MuTect nuclear          | 3465 ± 240                            | 3541 ± 240                             | 3538 ± 222                             |
| Mpileup nuclear         | 609 ± 54                              | 623 ± 39                               | 623 ± 41                               |
| VarScan2 nuclear        | 1120 ± 55                             | 1138 ± 51                              | 1140 ± 51                              |

Table 4: Summary of average execution times for each task for a 3-samples run with CES. The reported amount of processors is the number of them supplied to the whole run and managed by the chosen strategy. Only tasks with at least 60 seconds of execution time have been reported. PaCo tasks are labelled by \*.

| Task                    | 6 processors<br><i>Mean ± Std (s)</i> | 12 processors<br><i>Mean ± Std (s)</i> | 24 processors<br><i>Mean ± Std (s)</i> |
|-------------------------|---------------------------------------|----------------------------------------|----------------------------------------|
| Read trimming           | 5176 ± 576                            | 5350 ± 663                             | 5749 ± 894                             |
| Align to nuclear*       | 5476 ± 689                            | 3007 ± 373                             | 2859 ± 348                             |
| Align to exome*         | 3757 ± 498                            | 2045 ± 299                             | 1229 ± 166                             |
| Align to MT*            | 319 ± 42                              | 332 ± 41                               | 359 ± 40                               |
| Sort nuclear            | 1019 ± 113                            | 1038 ± 126                             | 1213 ± 146                             |
| Sort exome              | 312 ± 49                              | 321 ± 38                               | 395 ± 44                               |
| Sort MT                 | 138 ± 15                              | 151 ± 17                               | 163 ± 20                               |
| Mark nuclear            | 1136 ± 152                            | 1154 ± 127                             | 1253 ± 146                             |
| Mark MT                 | 135 ± 15                              | 149 ± 18                               | 159 ± 24                               |
| Index nuclear           | 150 ± 24                              | 161 ± 25                               | 178 ± 21                               |
| Realign INDELS nuclear* | 1182 ± 158                            | 1221 ± 133                             | 1274 ± 159                             |
| Realign INDELS MT*      | 203 ± 23                              | 219 ± 31                               | 236 ± 25                               |
| Compute BQSR nuclear*   | 1371 ± 129                            | 1008 ± 102                             | 811 ± 72                               |
| Apply BQSR nuclear      | 3558 ± 451                            | 2740 ± 357                             | 2811 ± 349                             |
| Apply BQSR MT           | 623 ± 80                              | 503 ± 55                               | 507 ± 70                               |
| Post BQSR nuclear*      | 3864 ± 359                            | 3603 ± 346                             | 3552 ± 330                             |
| MuTect nuclear          | 3686 ± 294                            | 3936 ± 245                             | 3863 ± 495                             |
| Mpileup nuclear         | 649 ± 59                              | 722 ± 65                               | 713 ± 67                               |
| VarScan2 nuclear        | 1206 ± 46                             | 1328 ± 68                              | 1307 ± 176                             |
