# Supplementary material for: Impact of concurrency on the performance of a whole exome sequencing pipeline
Source: PubMed Central journal article supplement (PMC7874478; doi:10.1186/s12859-020-03780-3), 2021-02-09

# 3 Samples with 6 processors

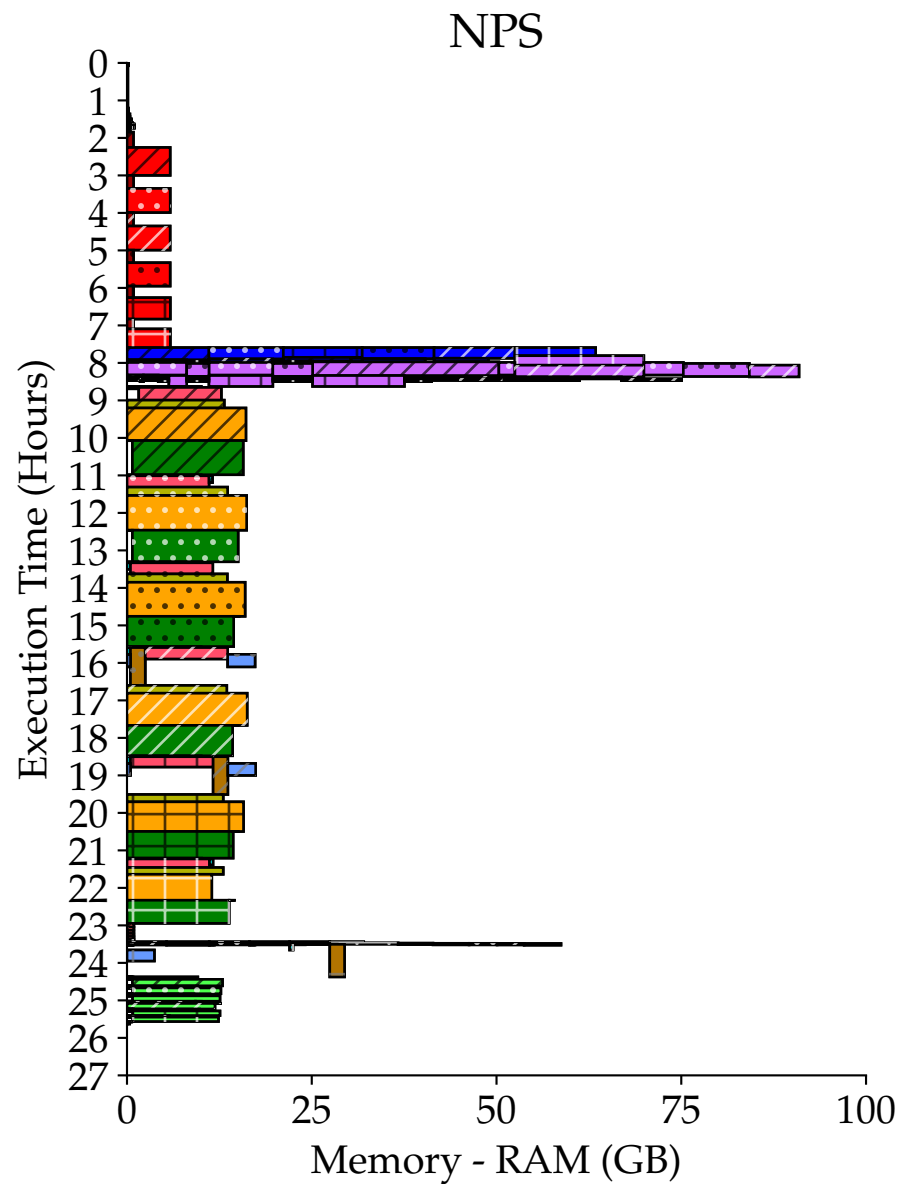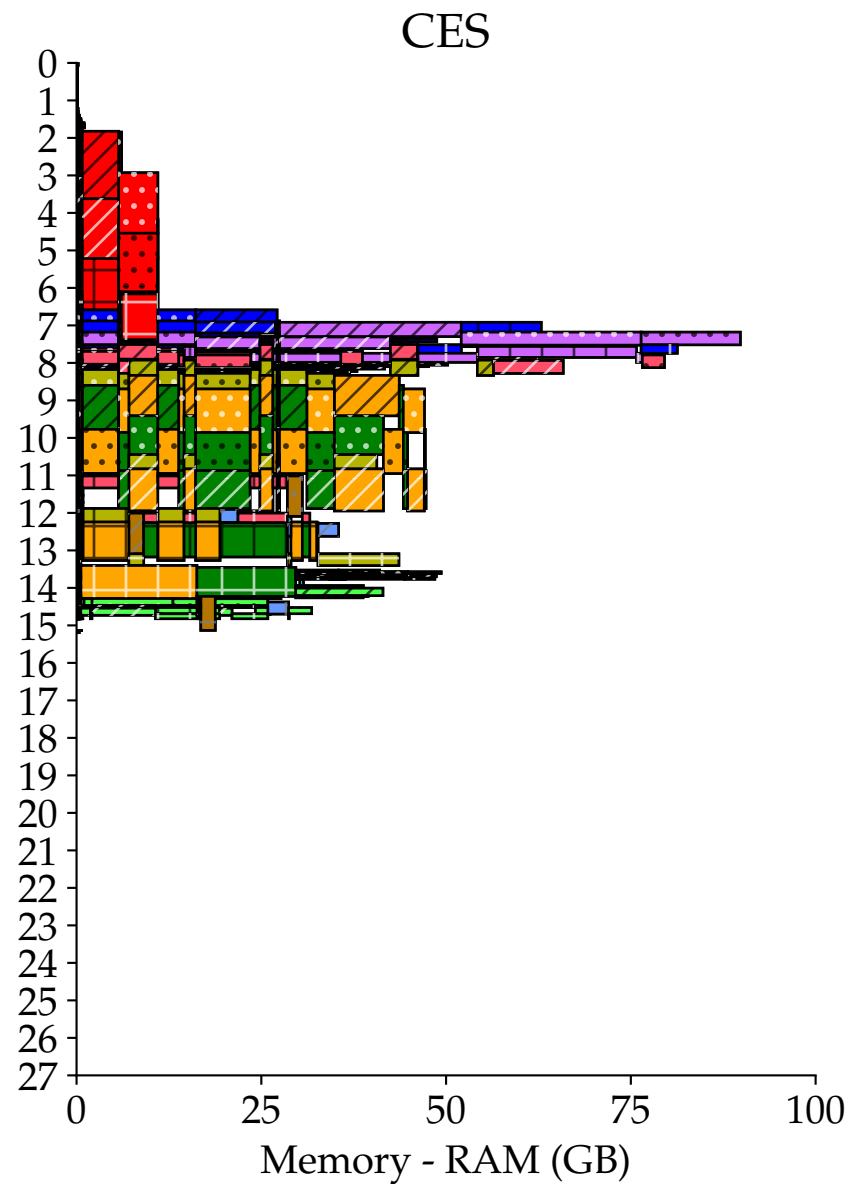

# 3 Samples with 12 processors

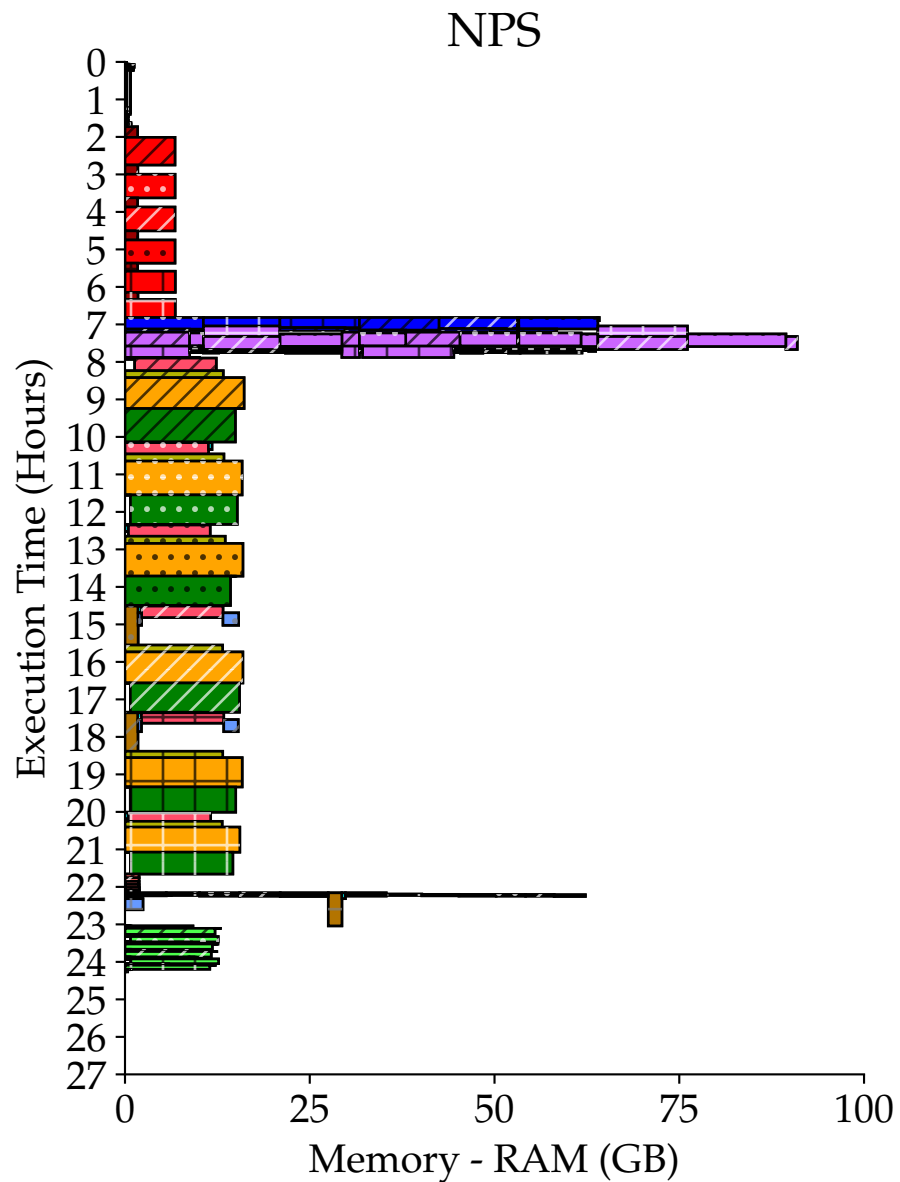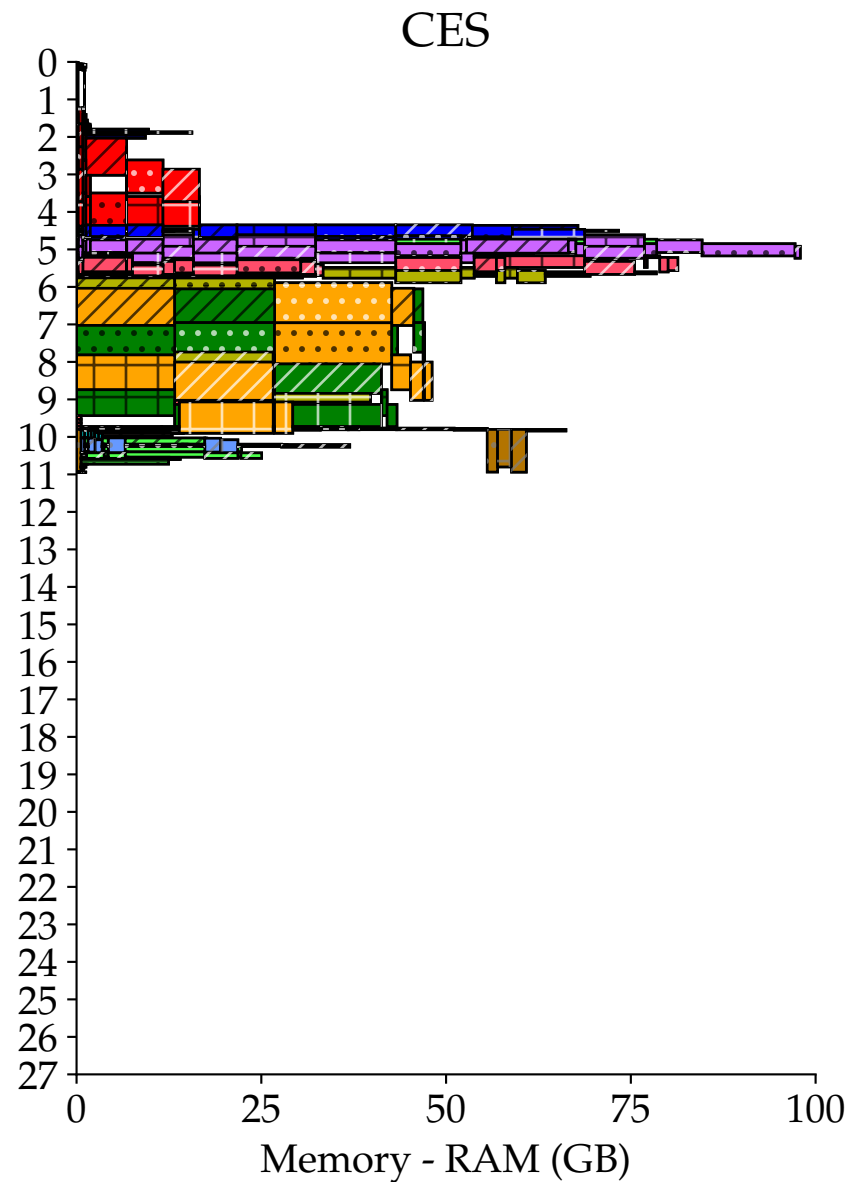

# 3 Samples with 24 processors

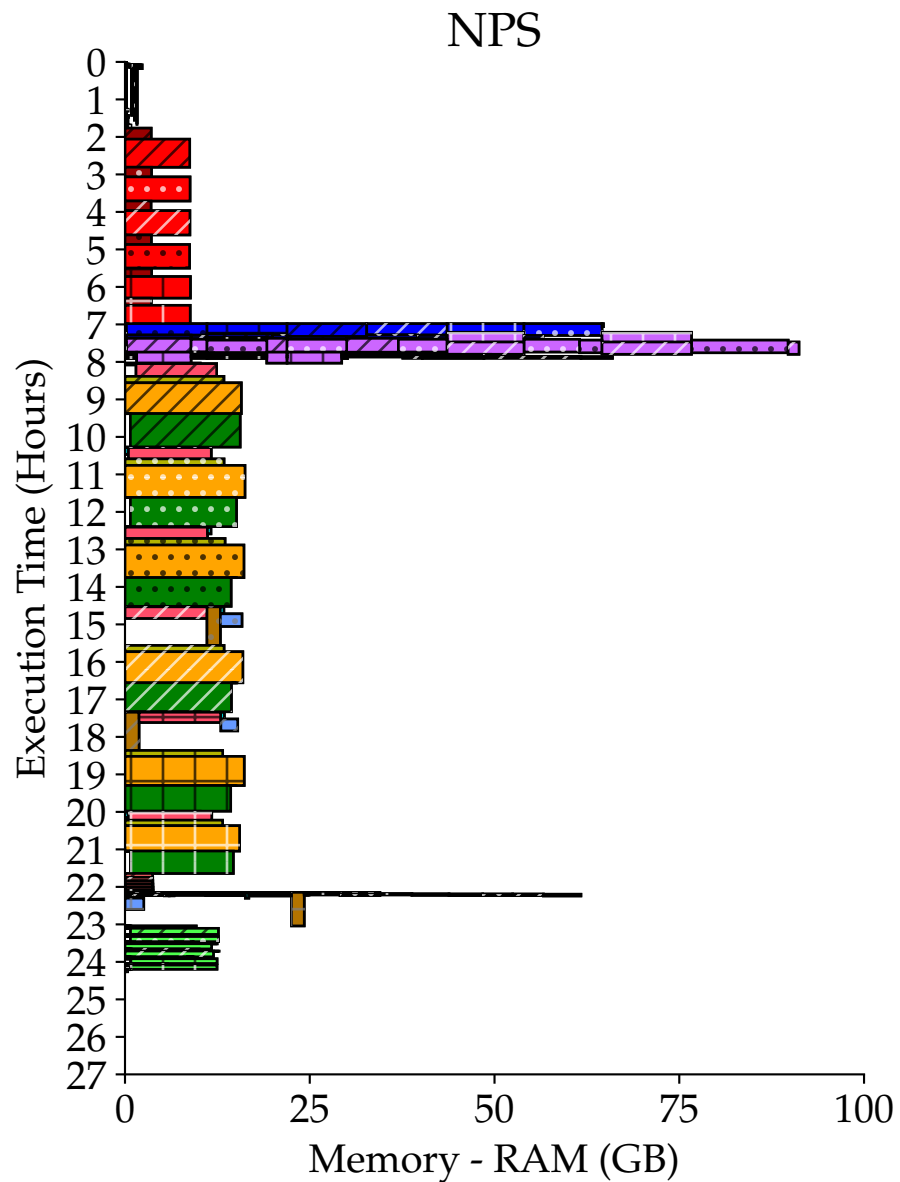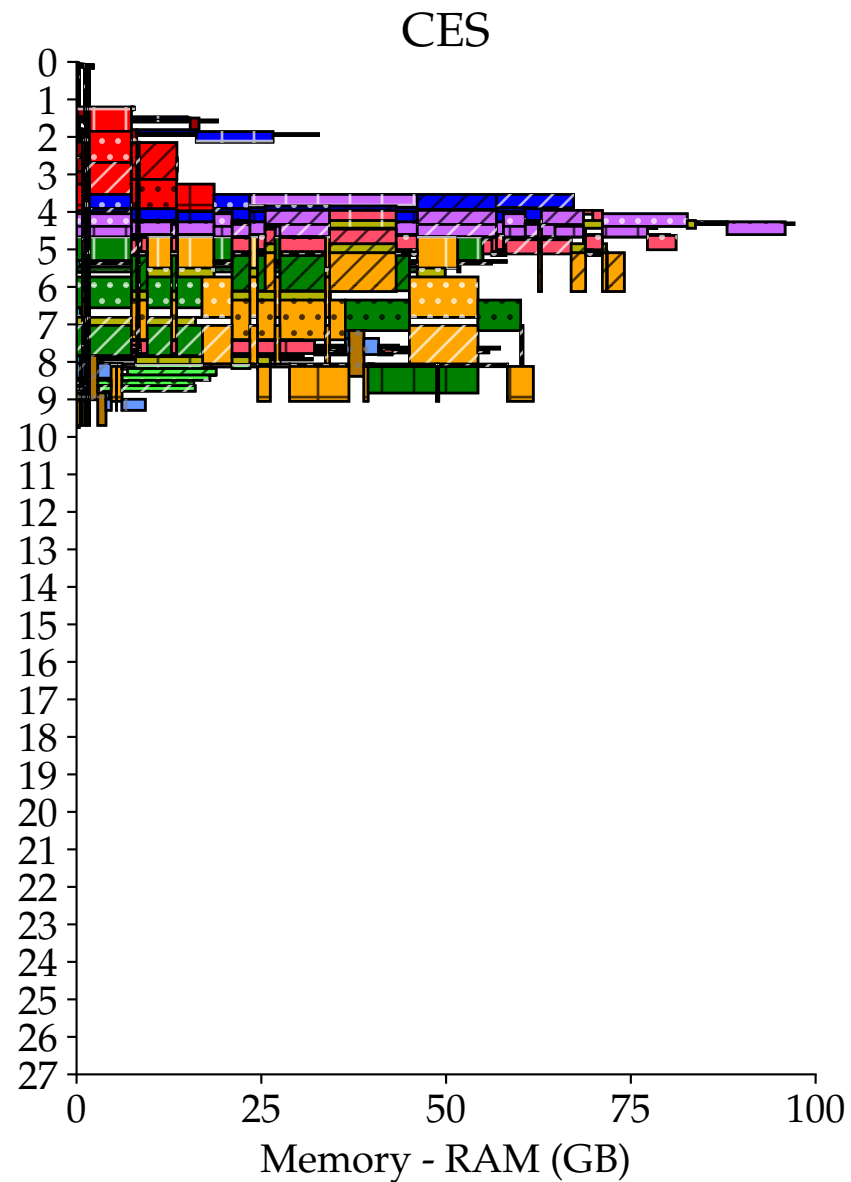

Supplement: 12859_2020_3780_MOESM3_ESM.pdf [file 12859_2020_3780_MOESM3_ESM.pdf]
